# Supplementary material for: Insect multimeric G-quadruplexes fold into antiparallel structures of different compactness and stability in K + and Na + solutions
Source: Royal Society of Chemistry journal article supplement (doi:10.1039/d3ra06805f), 2023-01-01
Supplement: d3ra06805f1.pdf [file d3ra06805f1.pdf]

## **Insect multimeric G-quadruplexes fold into antiparallel structures of different compactness and stability in K<sup>+</sup> and Na<sup>+</sup> solutions**

Chao Gao,<sup>a,†</sup> Jixin Chen,<sup>a,†</sup> Naureen Anwar,<sup>b</sup> Jieya Deng,<sup>a</sup> Zhangqian Wang,<sup>a,\*</sup> Muhammad Umer<sup>c,\*</sup>, and Yi He<sup>a,\*</sup>

<sup>a</sup>. National R&D Center for Se-rich Agricultural Products Processing, Hubei Engineering Research Center for Deep Processing of Green Se-rich Agricultural Products, School of Modern Industry for Selenium Science and Engineering, Wuhan Polytechnic University, Wuhan 430023, China.

<sup>b</sup>. Department of Biology, Faculty of Science and Technology, Virtual University of Pakistan, Punjab, 54000, Pakistan.

<sup>c</sup>. Institute for Forest Resources and Environment of Guizhou and Forestry College, Research Center of Forest Ecology, Guizhou University, Guiyang, 550025, China.

† The authors wish it to be known that, in their opinion, the first two authors should be regarded as Joint First Authors.

\*To whom correspondence should be addressed. Email: wzqsnu@whpu.edu.cn, umer@gzu.edu.cn, yi.he@whpu.edu.cn.

|                                                                                                                                                                                |          |
|--------------------------------------------------------------------------------------------------------------------------------------------------------------------------------|----------|
| <b>Supplementary tables and figures.....</b>                                                                                                                                   | <b>2</b> |
| <b>Table S1.</b> Oligonucleotide sequences used in the experiment.....                                                                                                         | 3        |
| <b>Figure S1.</b> Fluorescence spectra of a modified (A) Bom17 and (B) Bom 37 with 5'-FAM and 3'-TAMRA in 10 mM Tris-HCl (pH 7.5) buffer containing 100 mM KCl/NaCl.....       | 4        |
| <b>Figure S2.</b> CD spectra of <i>c-MYC</i> G-quadruplex in 10 mM Tris-HCl (pH 7.50) and 100 mM KCl/NaCl solutions.....                                                       | 5        |
| <b>Figure S3.</b> Determination of FRET efficiency of <i>c-MYC</i> G-quadruplexes in KCl/NaCl solutions.....                                                                   | 6        |
| <b>Figure S4.</b> Native polyacrylamide gel electrophoresis analysis of Bom17 and Bom37 in $K^+/Na^+$ solutions.....                                                           | 7        |
| <b>Figure S5.</b> Fluorescence spectra of 3.0 $\mu$ M BMPQ-1 with/without 10.0 $\mu$ M Bom17 G-quadruplex in 10 mM Tris-HCl (pH 7.5) buffer containing 100 mM KCl or NaCl..... | 8        |
| <b>Figure S6.</b> The dissociation constant ( $K_D$ ) values of BMPQ-1 and Bom17, Bom37 G-quadruplexes in $K^+/Na^+$ solutions.....                                            | 9        |
| <b>Figure S7.</b> The survival rate of SF9 cells after 48 hours of treatment with different concentrations of BMPQ-1.....                                                      | 10       |

**Table S1** Oligonucleotide sequences used in the experiment

| <b>Name</b>  | <b>Sequence(5'→3')</b>                                   |
|--------------|----------------------------------------------------------|
| Bom17        | GG(TTAGG) <sub>3</sub>                                   |
| Bom37        | GG(TTAGG) <sub>7</sub>                                   |
| Bom57        | GG(TTAGG) <sub>11</sub>                                  |
| Bom77        | GG(TTAGG) <sub>15</sub>                                  |
| Bom97        | GG(TTAGG) <sub>19</sub>                                  |
| <i>c-MYC</i> | TGGGGAGGGTGGGGAGGGTGGGGAAGG                              |
| Bom39-Ap1    | (2-AP)GG(TTAGG) <sub>7</sub> A                           |
| Bom39-AP21   | AGG(TTAGG) <sub>3</sub> TT(2-AP)GG(TTAGG) <sub>3</sub> A |
| Bom39-AP39   | (2-AP)GG(TTAGG) <sub>7</sub> (2-AP)                      |

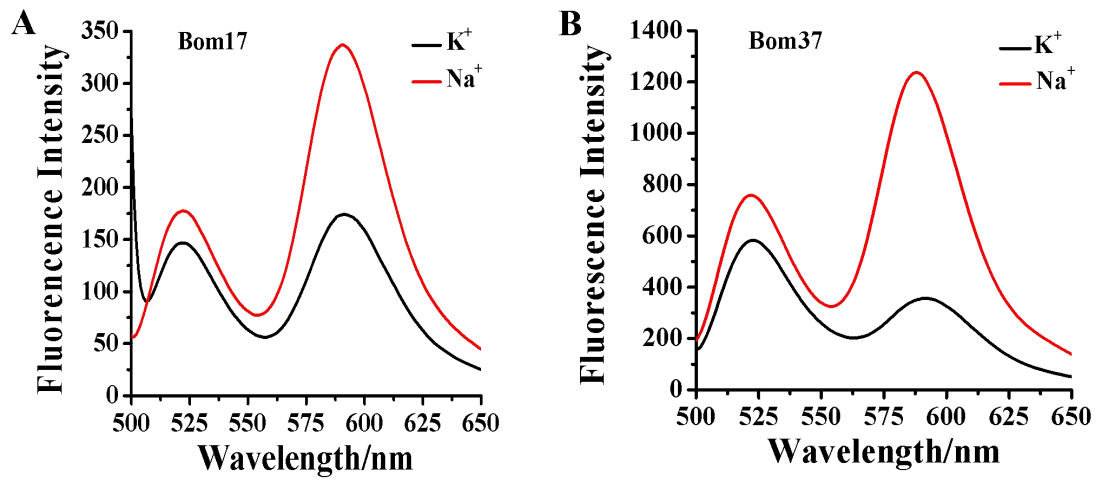

**Figure S1.** Fluorescence spectra of a modified (A) Bom17 and (B) Bom 37 with 5'-FAM and 3'-TAMRA in 10 mM Tris-HCl (pH 7.5) buffer containing 100 mM KCl/NaCl.  $\lambda_{ex} = 488$  nm.

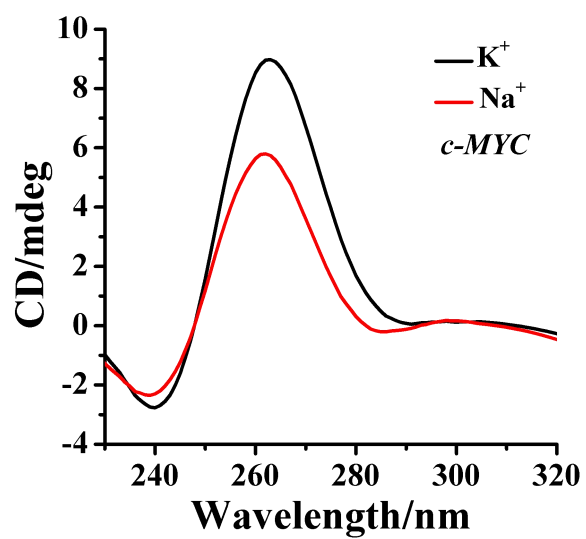

**Figure S2.** CD spectra of *c*-MYC G-quadruplex in 10 mM Tris-HCl (pH 7.50) and 100 mM KCl/NaCl solutions. The concentration of oligonucleotides was 10  $\mu$ M.

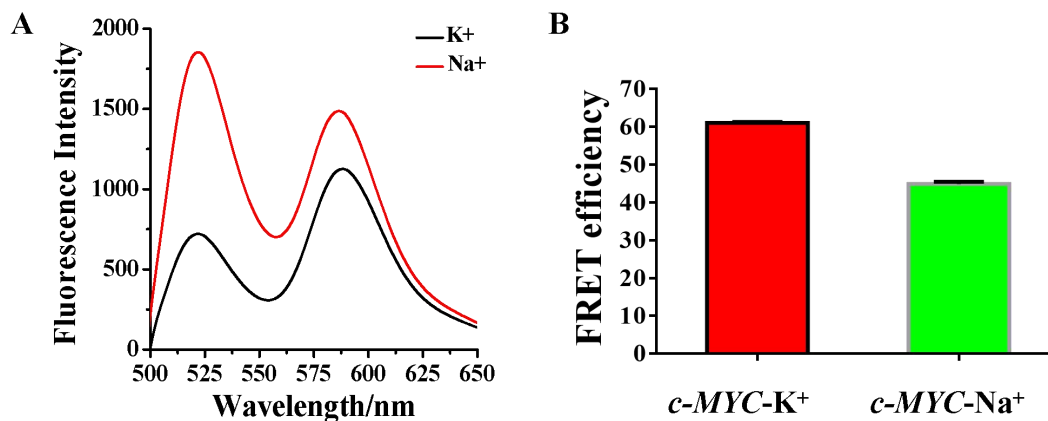

**Figure S3.** Determination of FRET efficiency of *c-MYC* G-quadruplexes in KCl/NaCl solutions. (A) Fluorescence spectra of a modified *c-MYC* with 5'-FAM and 3'-TAMRA in 10 mM Tris-HCl (pH 7.50) buffer containing 100 mM KCl/NaCl.  $\lambda_{ex}$  = 488 nm. (B) FRET efficiency of *c-MYC* G-quadruplex in KCl/NaCl solutions. Fluorescence intensities were measured at  $\lambda_{em}$  = 525 nm (FAM) and 585 nm (TAMRA).

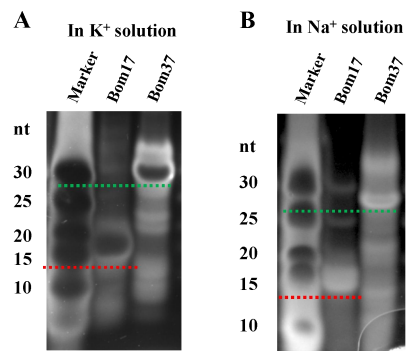

**Figure S4.** Native polyacrylamide gel electrophoresis analysis of Bom17 and Bom37 in 100 mM (A) K<sup>+</sup> and (B) solution. Native gel electrophoresis was run on 20% polyacrylamide gel. The concentration of oligonucleotides was 6.0  $\mu$ M.

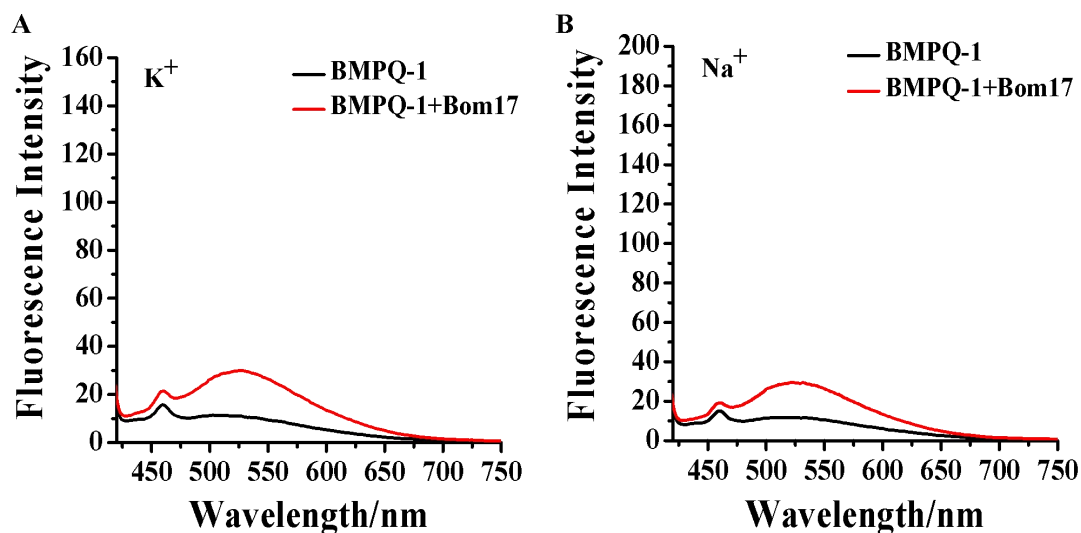

**Figure S5.** Fluorescence spectra of BMPQ-1 with/without Bom17 G-quadruplex in 10 mM Tris-HCl (pH 7.5) buffer containing 100 mM (A) KCl or (B) NaCl. The concentration of Bom17 was 10.0  $\mu\text{M}$ , and BMPQ-1 was 3.0  $\mu\text{M}$ .  $\lambda_{\text{ex}} = 395 \text{ nm}$ .



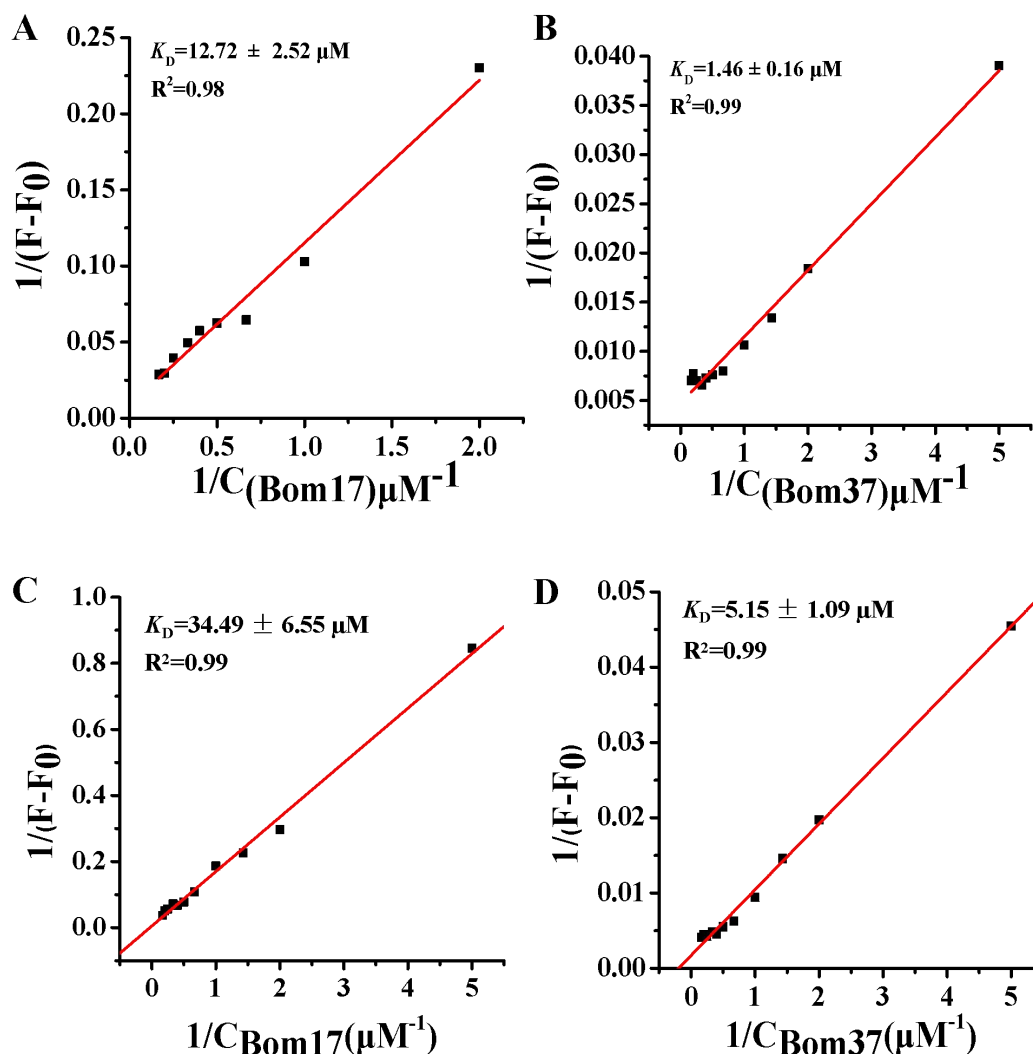

**Figure S6.** Benesi-Hildebrand plot of  $1/(F-F_0)$  versus  $1/[\text{DNA}]$ . The dissociation constant ( $K_D$ ) value of BMPQ-1 and (A) Bom17 and (B) Bom37 G-quadruplexes in 100 mM KCl solution was calculated as  $12.72 \pm 2.52 \mu\text{M}$  and  $1.46 \pm 0.16 \mu\text{M}$ , respectively. The dissociation constant ( $K_D$ ) value of BMPQ-1 and (C) Bom17 and (D) Bom37 G-quadruplexes in 100 mM NaCl solution was calculated as  $34.49 \pm 6.55 \mu\text{M}$  and  $5.15 \pm 1.09 \mu\text{M}$ , respectively.

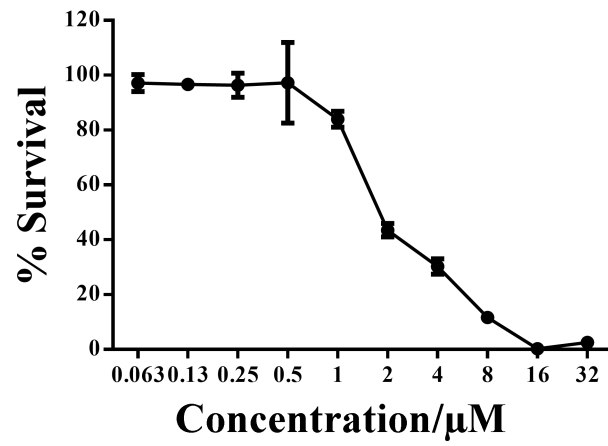

**Figure S7.** The survival rate of SF9 cells after 48 hours of treatment with different concentrations of BMPQ-1.
